# Supplementary material
Source: MDPI journal article supplement (https://www.mdpi.com/2311-5637/9/5/430)
Supplement: s1 [file s1 › fermentation-2283416-supplementary.pdf]

Supplementary Materials:

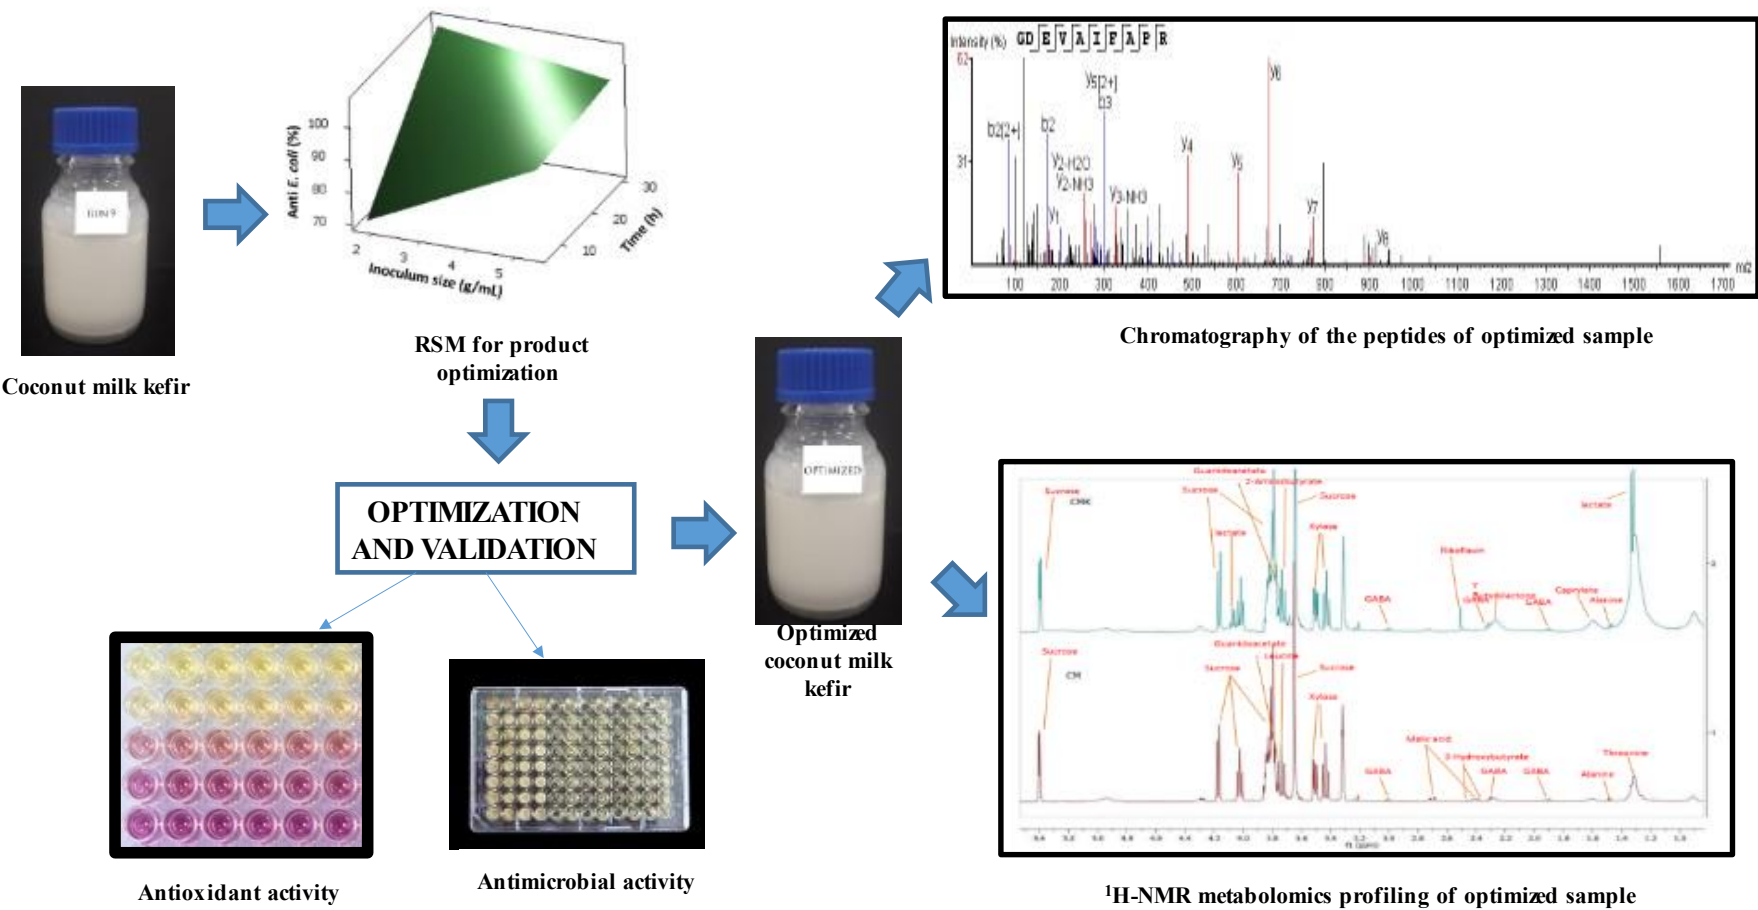

Figure S1. Graphical Abstract.

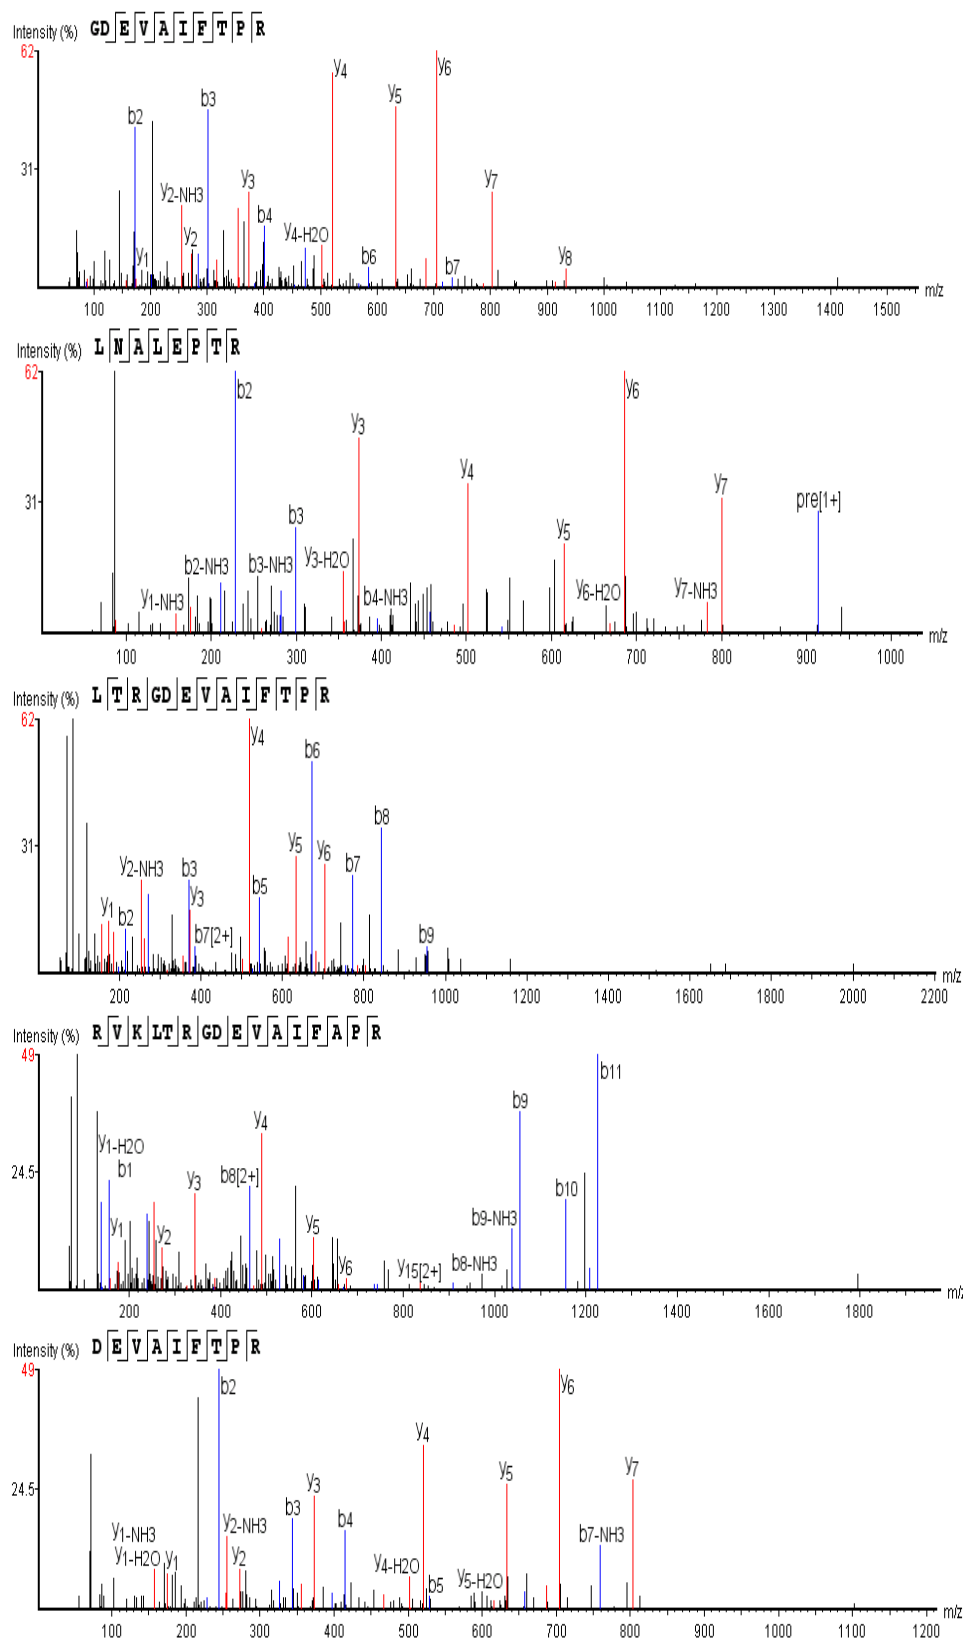

**Figure S2.** PEAKS STUDIO chromatography of the peptides of COS1\_COCNU Cocosin 1 OS=Cocos nucifera obtained from the fermentation of coconut milk with kefir grains.

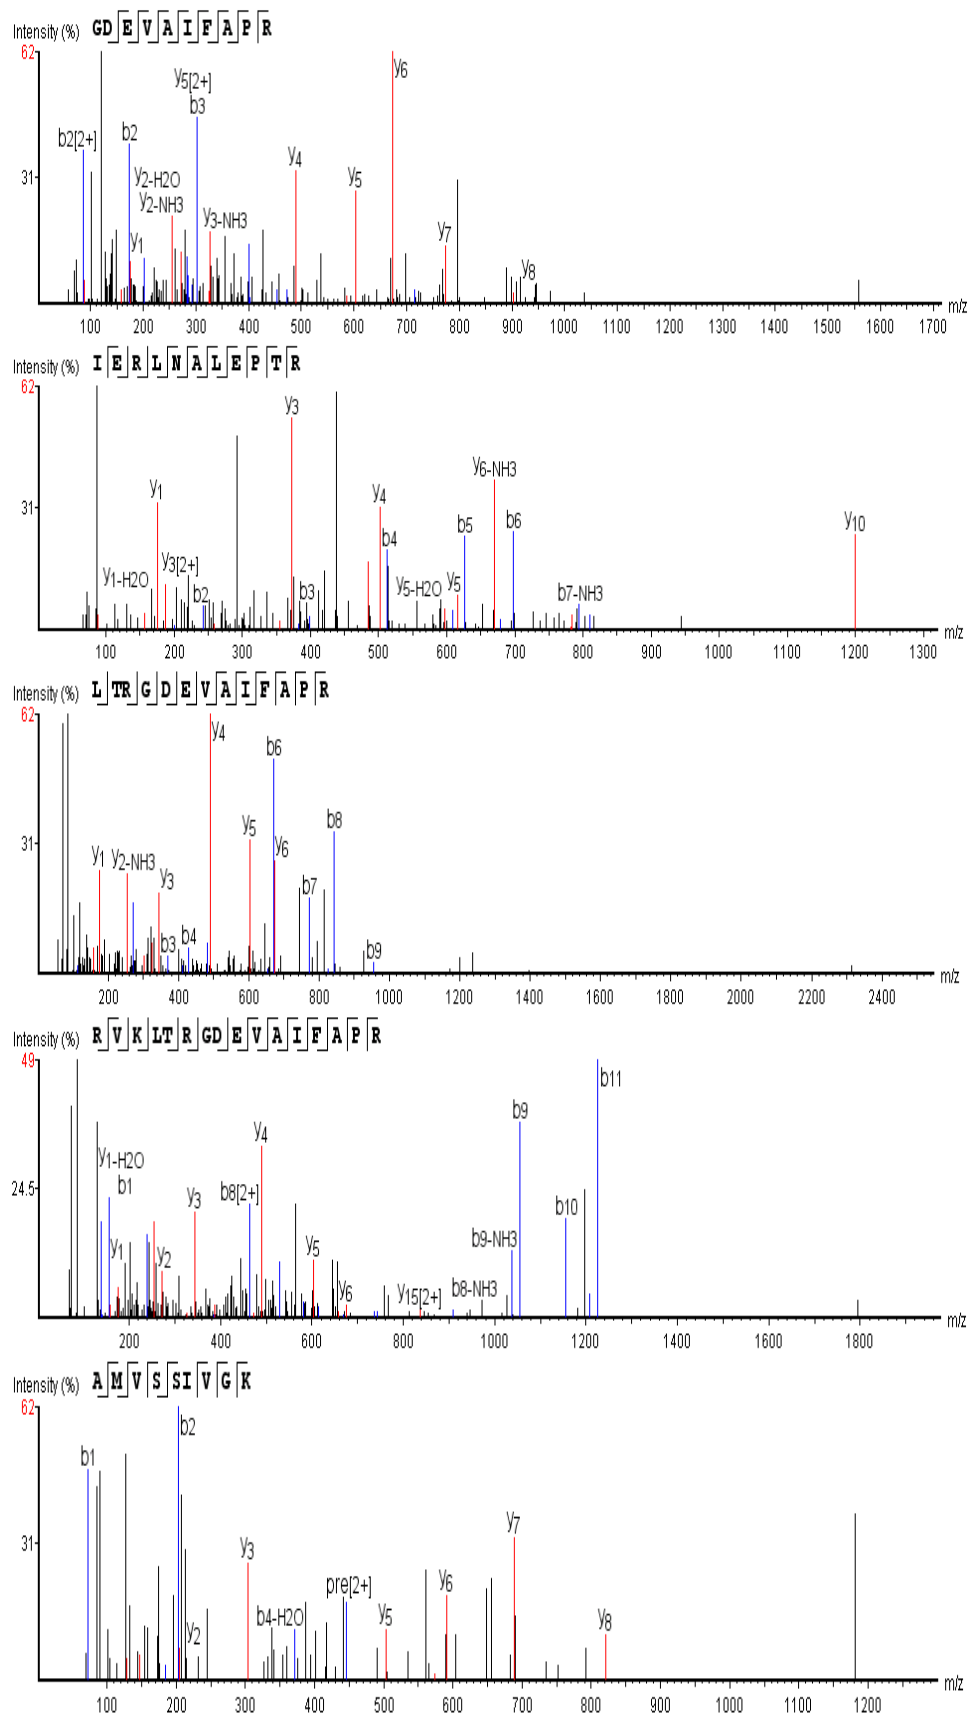

**Figure S3.** PEAKS STUDIO chromatography of the peptides of COCNU 11S globulin isoform 2 OS=Cocos nucifera obtained from the fermentation of coconut milk with kefir grains.
